# Supplementary material
Source: Springer Nature journal article supplement (https://www.springermedizin.de/resource/supplementary/12888_2014_1554_MOESM2_ESM.pdf/9481366)
Supplement: MOESM2 [file 9481366]

Registration: Study information

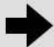

- 1 months
- Screening
  - Interview for DSM
  - Intake questionnaires
  - Verbal & written consent

1 Session

Assessment

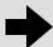

- 3-5 months
- CBT-treatment for GAD
  - Pre/post session reports
  - Pre/Post assessment
  - Video recordings

14 sessions à 50 minutes

Treatment

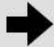

- after 6 months
- Booster-session
  - Follow-up assessment

1 Session

Relapse prevention
